# Supplementary material for: Meloxicam ameliorates the cartilage and subchondral bone deterioration in monoiodoacetate-induced rat osteoarthritis
Source: PeerJ. 2017 Apr 12;5:e3185. doi: 10.7717/peerj.3185 (PMC5391791; doi:10.7717/peerj.3185)
Supplement: Data S1 [file peerj-05-3185-s003.xlsx]

## Sheet: Data
No.	Animal ID	Group	SR (synovial reaction)	SBD (calcified cartilage and subchondral bone damage score)	CDZ1 (cartilage degeneration zone 1)	CDZ2 (cartilage degeneration zone 2)	CDZ3 (cartilage degeneration zone 3)	CDS (cartilage degeneration score, = sum of CDZ1,2,3)	TCDW (total cartilage degeneration width, um)	IL-6_3 (IL-6, pg/ml, week 3)	IL-6_7 (IL-6, pg/ml, week 7)	IL-6_11 (IL-6, pg/ml, week 11)	IL-10_3 (IL-10, pg/ml, week 3)	IL-10_7 (IL-6, pg/ml, week 7)	IL-10_11 (IL-10, pg/ml, week 11)	TNF_3 (TNF alpha, pg/ml, week 3)	TNF-7 (TNF alpha, pg/ml, week 7)	TNF-11 (TNF alpha, pg/ml, week 11)	Cox-2_C (Cox-2 cartilage %)	Cox-2_SB (Subchondral bone%)	Cox-2 BM (Cox-2, bone marrow)
1	1-1	I	0	0	0	0	0	0	0	35.25	56.41	33.4875	3.73	8.32	4.9	3.29	4.37	4.37	0	0	0
2	2-1	I	0	0	0	0	0	0	0	29.9625	26.4375	26.4375	6.05	4.9	11.12	4.37	4.37	4.37	0	0	0
3	3-1	I	0	0	1	0	0	1	800	29.9625	33.4875	24.675	8.32	8.32	3.73	4.37	3.29	2.18	0	0	0
4	4-1	I	0	0	0	0	0	0	0										0	0	0
5	5-1	I	0	0	0	0	0	0	0	22.9125	24.675	26.4375	3.14	3.73	18.33	4.37	6.54	4.37	0	0	0
6	6-1	I	0	0	0	0	0.5	0.5	0	44.0625	29.9625	19.3875	8.88	2.54	12.79	6.57	2.18	4.37	0	0	0
7	7-1	I	0	0	0	0	0	0	0	26.4375	22.9125	29.9625	3.73	6.05	13.35	2.16	2.18	4.37	0	0	0
8	8-1	I	0	0	0	1.5	0	1.5	400	26.4375	31.725	22.9125	3.73	2.54	1.29	2.16	4.37	2.18	0	0	0
9	10-1	I	0	0	0	0	0	0	0	35.25	33.4875	37.0125	19.43	7.19	7.75	5.45	2.18	2.18	0	0	0
10	11-1	I	0	0	3	3	0	6	1350	22.9125	33.49	42.3	6.05	16.12	1.92	3.29	4.37	2.18	0	0	0
11	1-2	II	0	0	0	3	5	8	1280	21.15	24.675	37.0125	7.8	2.14	3.68	8.72	4.36	2.18	0	4	10
12	2-2	II	0	2	5	5	5	15	2000	31.725	28.2	31.725	0.33	7.8	22.98	4.36	4.36	2.18	0	0	0
13	3-2	II	0	4	4.5	5	5	14.5	2000	26.4375	42.3	31.725	5.11	16.87	5.11	4.36	6.54	4.36	3	12	28
14	5-2	II	3	2	5	5	5	15	2000	21.15	22.9125	28.2	7.8	5.11	3.68	2.18	4.36	2.18	3	5	5
15	6-2	II	0	1.5	2	5	5	12	1600	24.675	24.675	28.2	11.57	13.97	9.09	4.36	3.41	2.18	5	3	17
16	7-2	II	0	3	5	5	5	15	2000	35.25	35.25	24.675	7.8	7.8	2.14	2.18	4.36	2.18	0	3	4
17	8-2	II	1	3	5	5	5	15	2000	31.725	26.4375	28.2	3.68	2.14	3.68	2.18	4.36	4.36	4	18	32
18	9-2	II	3	5	3.5	5	3	11.5	1280	28.2	29.9625	17.625	5.11	12.78	6.33	2.18	2.18	2.18	0	3	0
19	10-2	II	0	2	3	4	4	11	1450	24.675	35.25	35.25	5.11	2.14	2.93	0.1	2.18	4.36	0	4	3
20	11-2	II	3	3	4	4	4	12	1520	21.15	29.9625	21.15	2.14	3.68	3.68	0.1	2.18	2.18	5	11	30
21	12-2	II	2	2.5	2	3	2	7	1120										0	9	5
22	1-3	III	0	0	1	0	2	3	650	35.25	28.2	14.1	3.68	7.8	0.33	2.18	4.36	2.18	0	0	0
23	2-3	III	1	1	1	5	3	9	800	40.5375	24.675	18.4	3.68	3.68	3.72	4.36	2.18	2.18	0	3	4
24	3-3	III	3	4	4	4	4	12	1600	31.725	37.0125	24.675	9.09	4.41	5.11	1.09	2.18	2.18	0	5	3
25	4-3	III	0	0.5	2	3	5	10	950	24.675	24.675	21.15	5.81	2.14	3.72	4.36	2.18	2.91	0	0	0
26	5-3	III	0	1	2	4	2.5	8.5	400	44.0625	33.7	26.4375	37.49	3.72	0.33	8.72	3.04	2.18	0	4	0
27	6-3	III	1	1	2	3	3	8	1200	31.725	26.4375	31.725	0.33	0.33	5.11	0.1	2.18	4.36	0	0	0
28	7-3	III	1	2	1	1.5	2	4.5	650										0	3	5
29	8-3	III	1	1	2	3	4	9	950	24.675	24.675	33.4875	7.89	3.68	7.8	3.66	3.27	4.36	0	0	0
30	9-3	III	0	4	4	4	4	12	2000	51.1125	0.025	21.15	2.14	0.01	3.68	3.41	0.1	2.18	0	3	4
31	10-3	III	3	0	4	3	4	11	2000	21.15	28.2	24.675	5.11	7.15	3.68	4.36	6.54	4.36	0	0	0
32	11-3	III	0	3	2	2	3	7	450	24.675	26.44	12.3375	3.68	3.68	3.68	4.36	4.36	2.18	0	0	0
33	12-3	III	1	2	1	3	2	6	550										0	4	3
34	1-4	IV	1	1	1	3	4	8	950	24.675	26.4375	24.675	3.68	3.68	4.9	2.18	2.18	4.37	0	0	0
35	2-4	IV	1	1	1	3	1	5	650	21.15	21.15	12.3375	0.33	5.11	0.33	4.36	2.18	2.18	0	4	4
36	3-4	IV	3	2	3	3.5	4	10.5	1700	31.725	21.15	22.9125	8.45	4.41	1.29	8.72	2.18	2.18	0	0	0
37	4-4	IV	0	0.5	1	3	2	6	850	24.675	28.2	17.625	5.11	6.48	3.73	2.18	4.36	4.37	0	0	0
38	5-4	IV	0	0	4	3.5	3	10.5	1500	22.9125	24.675	26.4375	0.33	0.33	2.54	4.36	2.18	2.18	0	0	0
39	6-4	IV	2	1.5	4	4	3	11	1500	24.675	17.625	29.9625	3.68	0.33	1.29	2.18	2.18	2.18	0	0	0
40	8-4	IV	1	3.5	2	4	2	8	1200	21.15	31.725	29.9625	2.14	5.11	0.33	4.36	3.27	2.18	0	0	4
41	9-4	IV	0	1	1	2.5	3	9.5	800	35.25	31.725	26.4375	7.8	15.14	3.73	2.18	2.18	3.27	0	5	0
42	10-4	IV	0	0	1	2	2	5	480										0	0	0
43	11-4	IV	0	0	2	2	4	8	800	24.675	28.2	38.775	0.1	3.68	6.05	0.1	2.18	4.37	0	0	0
44	12-4	IV	3	2	1	3	3	7	950	26.4375	33.4875	0.225	5.11	7.19	7.19	4.36	8.72	2.18	0	0	0

## Sheet: log10 Cytokine
No.	Animal ID	Group	IL_6_w3	IL_6_w3_log	IL_6_w7	IL_6_w7_log	IL_6_w11	IL-6_w11_log	IL_10_w3	IL_10_w3_log	IL_10_w7	IL_10_w7_log	IL_10_w11	IL_10_w11_log	TNF_w3	TNF_w3_log	TNF_w7	TNF_w7log	TNF_w11	TNF_w11_log
1	1-1	I	35.25	1.54716	56.41	1.75136	33.4875	1.52488	3.73	0.571709	8.32	0.920123	4.9	0.690196	3.29	0.517196	4.37	0.640481	4.37	0.640481
2	2-1	I	29.9625	1.47658	26.4375	1.42222	26.4375	1.42222	6.05	0.781755	4.9	0.690196	11.12	1.0461	4.37	0.640481	4.37	0.640481	4.37	0.640481
3	3-1	I	29.9625	1.47658	33.4875	1.52488	24.675	1.39226	8.32	0.920123	8.32	0.920123	3.73	0.571709	4.37	0.640481	3.29	0.517196	2.18	0.338456
4	4-1	I
5	5-1	I	22.9125	1.36007	24.675	1.39226	26.4375	1.42222	3.14	0.49693	3.73	0.571709	18.33	1.26316	4.37	0.640481	6.54	0.815578	4.37	0.640481
6	6-1	I	44.0625	1.64407	29.9625	1.47658	19.3875	1.28752	8.88	0.948413	2.54	0.404834	12.79	1.10687	6.57	0.817565	2.18	0.338456	4.37	0.640481
7	7-1	I	26.4375	1.42222	22.9125	1.36007	29.9625	1.47658	3.73	0.571709	6.05	0.781755	13.35	1.12548	2.16	0.334454	2.18	0.338456	4.37	0.640481
8	8-1	I	26.4375	1.42222	31.725	1.5014	22.9125	1.36007	3.73	0.571709	2.54	0.404834	1.29	0.11059	2.16	0.334454	4.37	0.640481	2.18	0.338456
9	10-1	I	35.25	1.54716	33.4875	1.52488	37.0125	1.56835	19.43	1.28847	7.19	0.856729	7.75	0.889302	5.45	0.736397	2.18	0.338456	2.18	0.338456
10	11-1	I	22.9125	1.36007	33.49	1.52492	42.3	1.62634	6.05	0.781755	16.12	1.20737	1.92	0.283301	3.29	0.517196	4.37	0.640481	2.18	0.338456
11	1-2	II	21.15	1.32531	24.675	1.39226	37.0125	1.56835	7.8	0.892095	2.14	0.330414	3.68	0.565848	8.72	0.940516	4.36	0.639486	2.18	0.338456
12	2-2	II	31.725	1.5014	28.2	1.45025	31.725	1.5014	0.33	-0.481486	7.8	0.892095	22.98	1.36135	4.36	0.639486	4.36	0.639486	2.18	0.338456
13	3-2	II	26.4375	1.42222	42.3	1.62634	31.725	1.5014	5.11	0.708421	16.87	1.22712	5.11	0.708421	4.36	0.639486	6.54	0.815578	4.36	0.639486
14	5-2	II	21.15	1.32531	22.9125	1.36007	28.2	1.45025	7.8	0.892095	5.11	0.708421	3.68	0.565848	2.18	0.338456	4.36	0.639486	2.18	0.338456
15	6-2	II	24.675	1.39226	24.675	1.39226	28.2	1.45025	11.57	1.06333	13.97	1.1452	9.09	0.958564	4.36	0.639486	3.41	0.532754	2.18	0.338456
16	7-2	II	35.25	1.54716	35.25	1.54716	24.675	1.39226	7.8	0.892095	7.8	0.892095	2.14	0.330414	2.18	0.338456	4.36	0.639486	2.18	0.338456
17	8-2	II	31.725	1.5014	26.4375	1.42222	28.2	1.45025	3.68	0.565848	2.14	0.330414	3.68	0.565848	2.18	0.338456	4.36	0.639486	4.36	0.639486
18	9-2	II	28.2	1.45025	29.9625	1.47658	17.625	1.24613	5.11	0.708421	12.78	1.10653	6.33	0.801404	2.18	0.338456	2.18	0.338456	2.18	0.338456
19	10-2	II	24.675	1.39226	35.25	1.54716	35.25	1.54716	5.11	0.708421	2.14	0.330414	2.93	0.466868	0.1	-1	2.18	0.338456	4.36	0.639486
20	11-2	II	21.15	1.32531	29.9625	1.47658	21.15	1.32531	2.14	0.330414	3.68	0.565848	3.68	0.565848	0.1	-1	2.18	0.338456	2.18	0.338456
21	12-2	II
22	1-3	III	35.25	1.54716	28.2	1.45025	14.1	1.14922	3.68	0.565848	7.8	0.892095	0.33	-0.481486	2.18	0.338456	4.36	0.639486	2.18	0.338456
23	2-3	III	40.5375	1.60786	24.675	1.39226	18.4	1.26482	3.68	0.565848	3.68	0.565848	3.72	0.570543	4.36	0.639486	2.18	0.338456	2.18	0.338456
24	3-3	III	31.725	1.5014	37.0125	1.56835	24.675	1.39226	9.09	0.958564	4.41	0.644439	5.11	0.708421	1.09	0.0374265	2.18	0.338456	2.18	0.338456
25	4-3	III	24.675	1.39226	24.675	1.39226	21.15	1.32531	5.81	0.764176	2.14	0.330414	3.72	0.570543	4.36	0.639486	2.18	0.338456	2.91	0.463893
26	5-3	III	44.0625	1.64407	33.7	1.52763	26.4375	1.42222	37.49	1.57392	3.72	0.570543	0.33	-0.481486	8.72	0.940516	3.04	0.482874	2.18	0.338456
27	6-3	III	31.725	1.5014	26.4375	1.42222	31.725	1.5014	0.33	-0.481486	0.33	-0.481486	5.11	0.708421	0.1	-1	2.18	0.338456	4.36	0.639486
28	7-3	III
29	8-3	III	24.675	1.39226	24.675	1.39226	33.4875	1.52488	7.89	0.897077	3.68	0.565848	7.8	0.892095	3.66	0.563481	3.27	0.514548	4.36	0.639486
30	9-3	III	51.1125	1.70853	0.025	-1.60206	21.15	1.32531	2.14	0.330414	0.01	-2	3.68	0.565848	3.41	0.532754	0.1	-1	2.18	0.338456
31	10-3	III	21.15	1.32531	28.2	1.45025	24.675	1.39226	5.11	0.708421	7.15	0.854306	3.68	0.565848	4.36	0.639486	6.54	0.815578	4.36	0.639486
32	11-3	III	24.675	1.39226	26.44	1.42226	12.3375	1.09123	3.68	0.565848	3.68	0.565848	3.68	0.565848	4.36	0.639486	4.36	0.639486	2.18	0.338456
33	12-3	III
34	1-4	IV	24.675	1.39226	26.4375	1.42222	24.675	1.39226	3.68	0.565848	3.68	0.565848	4.9	0.690196	2.18	0.338456	2.18	0.338456	4.37	0.640481
35	2-4	IV	21.15	1.32531	21.15	1.32531	12.3375	1.09123	0.33	-0.481486	5.11	0.708421	0.33	-0.481486	4.36	0.639486	2.18	0.338456	2.18	0.338456
36	3-4	IV	31.725	1.5014	21.15	1.32531	22.9125	1.36007	8.45	0.926857	4.41	0.644439	1.29	0.11059	8.72	0.940516	2.18	0.338456	2.18	0.338456
37	4-4	IV	24.675	1.39226	28.2	1.45025	17.625	1.24613	5.11	0.708421	6.48	0.811575	3.73	0.571709	2.18	0.338456	4.36	0.639486	4.37	0.640481
38	5-4	IV	22.9125	1.36007	24.675	1.39226	26.4375	1.42222	0.33	-0.481486	0.33	-0.481486	2.54	0.404834	4.36	0.639486	2.18	0.338456	2.18	0.338456
39	6-4	IV	24.675	1.39226	17.625	1.24613	29.9625	1.47658	3.68	0.565848	0.33	-0.481486	1.29	0.11059	2.18	0.338456	2.18	0.338456	2.18	0.338456
40	8-4	IV	21.15	1.32531	31.725	1.5014	29.9625	1.47658	2.14	0.330414	5.11	0.708421	0.33	-0.481486	4.36	0.639486	3.27	0.514548	2.18	0.338456
41	9-4	IV	35.25	1.54716	31.725	1.5014	26.4375	1.42222	7.8	0.892095	15.14	1.18013	3.73	0.571709	2.18	0.338456	2.18	0.338456	3.27	0.514548
42	10-4	IV
43	11-4	IV	24.675	1.39226	28.2	1.45025	38.775	1.58855	0.1	-1	3.68	0.565848	6.05	0.781755	0.1	-1	2.18	0.338456	4.37	0.640481
44	12-4	IV	26.4375	1.42222	33.4875	1.52488	0.225	-0.647817	5.11	0.708421	7.19	0.856729	7.19	0.856729	4.36	0.639486	8.72	0.940516	2.18	0.338456
